# Supplementary material for: Plasma Treatment of Poly(ethylene terephthalate) Films and Chitosan Deposition: DC- vs. AC-Discharge
Source: PubMed Central journal article supplement (PMC7040612; doi:10.3390/ma13030508), 2020-01-21
Supplement: materials-13-00508-s001.pdf [file materials-13-00508-s001.pdf]

Article

# Plasma Treatment of Poly(ethylene terephthalate) Films and Chitosan Deposition: DC– vs. AC–Discharge

Tatiana S. Demina<sup>1,2,\*</sup>, Mikhail S. Piskarev<sup>1</sup>, Olga A. Romanova<sup>3</sup>, Andrey K. Gatin<sup>4</sup>, Boris R. Senatulin<sup>5</sup>, Elena A. Skryleva<sup>5</sup>, Tatiana M. Zharikova<sup>2</sup>, Alla B. Gilman<sup>1</sup>, Alexander A. Kuznetsov<sup>1</sup>, Tatiana A. Akopova<sup>1</sup> and Peter S. Timashev<sup>2,4,6</sup>

- <sup>1</sup> Enikolopov Institute of Synthetic Polymer Materials, Russian Academy of Sciences, 70 Profsoyuznaya str., 117393, Moscow, Russia; mikhailpiskarev@gmail.com (M.S.P.); plasma@ispm.ru (A.B.G.); kuznets24@yandex.ru (A.A.K.); akopova@ispm.ru (T.A.A.)
  - <sup>2</sup> Institute for Regenerative Medicine, Sechenov First Moscow State Medical University (Sechenov University), 8-2 Trubetskaya str., Moscow, 119991, Russia; zharikova.tm@gmail.com (T.M.Z.); timashev.peter@gmail.com (P.S.T.)
  - <sup>3</sup> NRC Kurchatov Institute, 1 Akademika Kurchatova pl., Moscow, 123182, Russia; olga.romanova034@gmail.com
  - <sup>4</sup> Semenov Institute of Chemical Physics, Russian Academy of Sciences, 4/1 Kosygina str., Moscow, 119991, Russia; akgatin@yandex.ru
  - <sup>5</sup> National University of Science and Technology “MISIS”, 4 Leninskiy pr., Moscow, 119049, Russia; borisrs@yandex.ru (B.R.S.); easkryleva@gmail.com (E.A.S.)
  - <sup>6</sup> Institute of Photonic Technologies, Research center “Crystallography and Photonics”, Russian Academy of Sciences, 2 Pionerskaya str., Troitsk, Moscow, 142190, Russia
- \* Correspondence: detans@gmail.com

Received: 24 October 2019; Accepted: 16 January 2020; Published: date

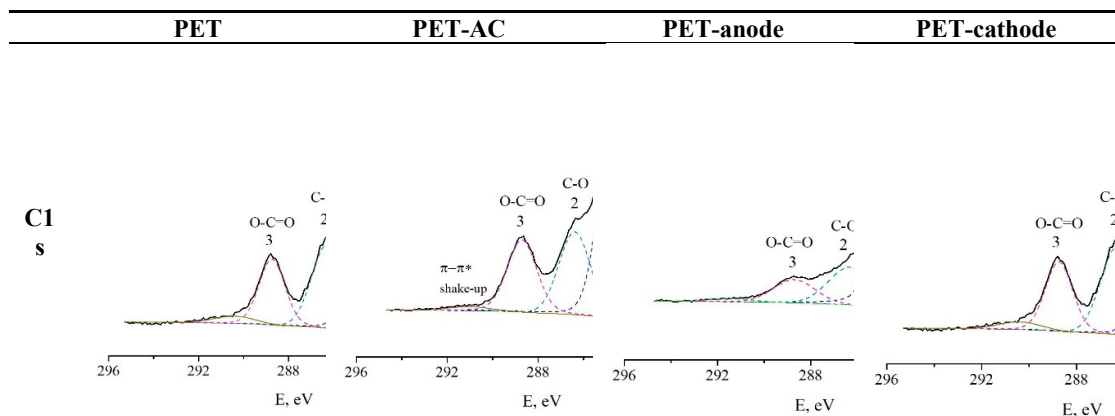

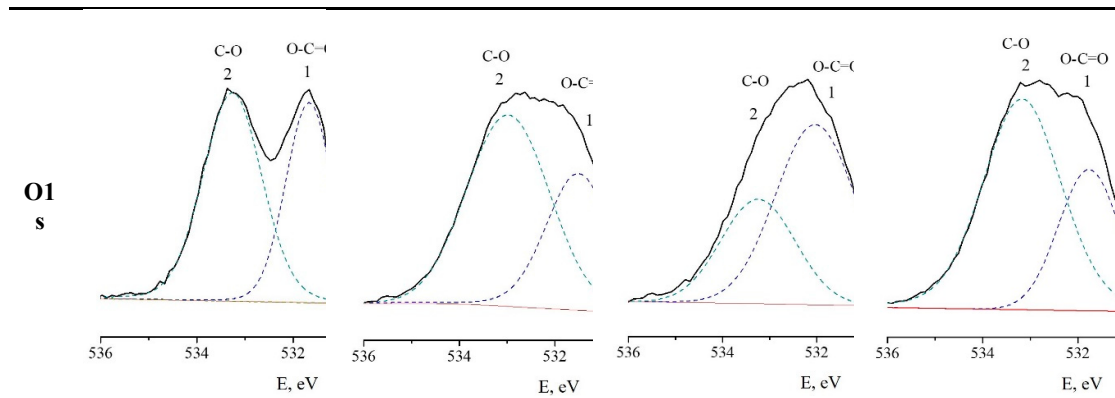

**Figure S1.** C1s and O1s spectra of the AC- and DC-discharge plasma treated PET films. Spectra of initial and DC-treated films are adapted by permission from Springer Nature: Springer Nature, High Energy Chem, Piskarev MS, Gilman AB, Gatin AK, Gaidar AI, Kurkin TS, Kuznetsov AA, Copyright (2019).

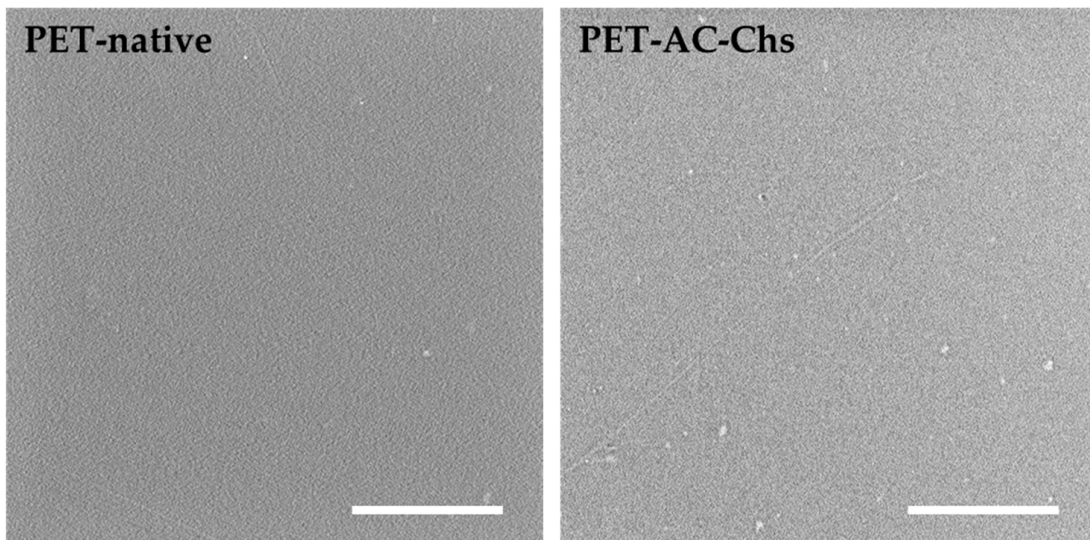

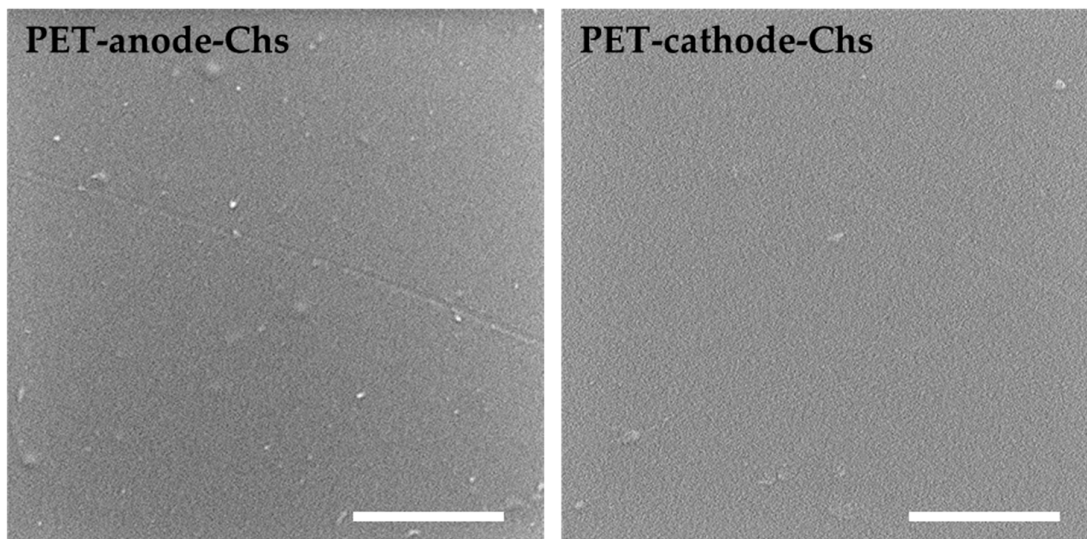

**Figure S2.** SEM micrographs of non-treated PET film and chitosan-coated plasma-treated PET films. Scale bar is 50  $\mu\text{m}$ .

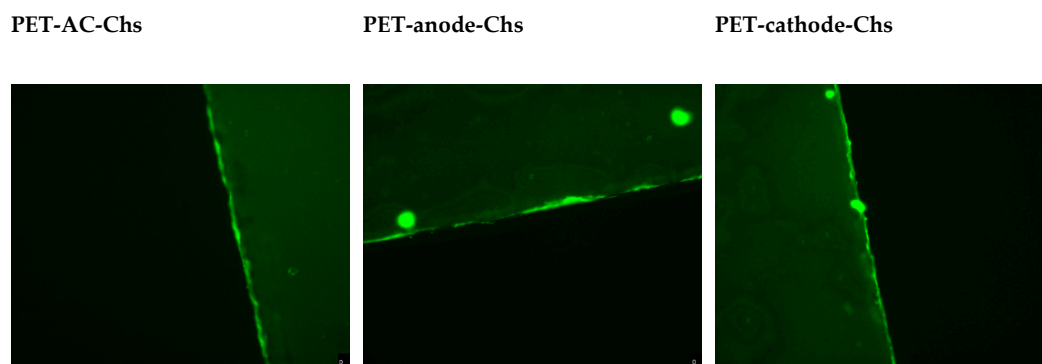

**Figure S3.** Fluorescent microscopy of FITC-labeled initial and plasma-treated PET films after immobilization of chitosan.

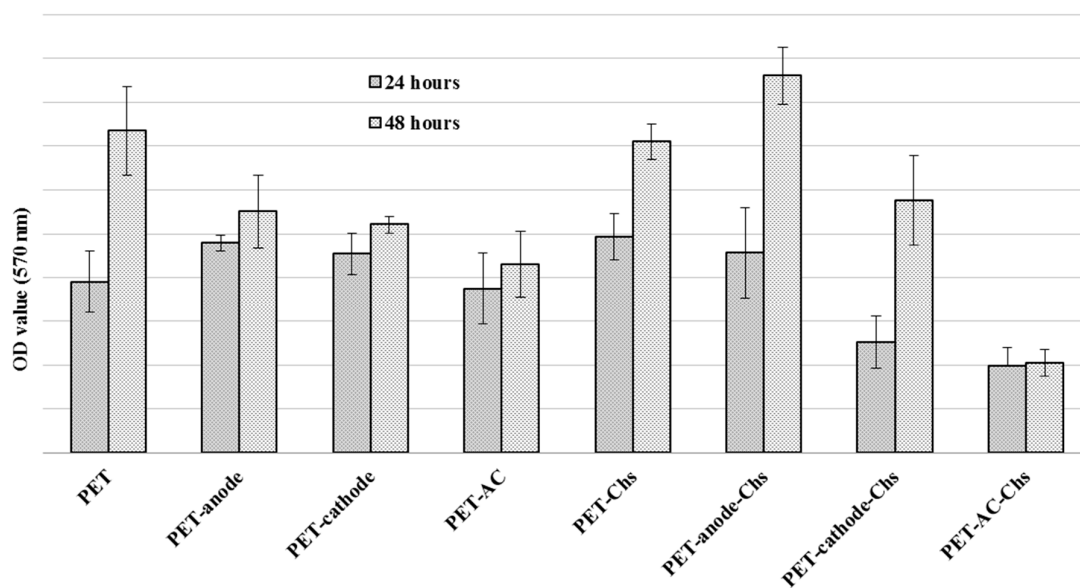

**Figure S4.** MTT-proliferation assay results (OD value) for human mesenchymal stem cells onto initial and plasma-treated PET films with/without chitosan-coating (24 and 48 hours in culture).

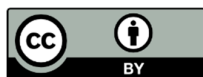

© 2020 by the authors. Submitted for possible open access publication under the terms and conditions of the Creative Commons Attribution (CC BY) license (<http://creativecommons.org/licenses/by/4.0/>).
